# Supplementary material
Source: PubMed Central journal article supplement (PMC4499114)
Supplement: NIHMS690291-supplement-01.pdf [file NIHMS690291-supplement-01.pdf]

## Supplemental Material

**Supplemental Table 1.** Comparison of Participants Who Did and Did Not Undergo the Year 5 Echocardiogram

| Variable                                                                  | Follow-up Echo<br>(n=842) | No Follow-up Echo<br>(n=297) | P value |
|---------------------------------------------------------------------------|---------------------------|------------------------------|---------|
| Age in years (IQR)                                                        | 70 (68 – 73)              | 72 (68 – 77)                 | <0.001  |
| Female (%)                                                                | 509 (60%)                 | 148 (50%)                    | 0.001   |
| Race (%)                                                                  |                           |                              |         |
| White                                                                     | 808 (96%)                 | 275 (93%)                    | 0.02    |
| Black                                                                     | 31 (4%)                   | 20 (7%)                      |         |
| Asian/Pacific Islander                                                    | 1 (0.1%)                  | 0 (0%)                       |         |
| Other                                                                     | 2 (0.2%)                  | 2 (0.7%)                     |         |
| Mean BMI (kg/m <sup>2</sup> ) ± SD                                        | 26.6 ± 4.0                | 26.6 ± 4.4                   | 0.86    |
| Hypertension (%)                                                          | 431(51%)                  | 183 (62%)                    | 0.002   |
| Coronary Artery Disease (%)                                               | 119 (14%)                 | 64 (22%)                     | 0.003   |
| Diabetes (%)                                                              | 108 (13%)                 | 56 (19%)                     | 0.009   |
| Mean Left Ventricular Diastolic Diameter Index* (cm/m <sup>2</sup> ) ± SD | 2.8 ± 0.3                 | 2.8 ± 0.4                    | 0.73    |
| Mean Left Ventricular Mass Index* (g/m <sup>2</sup> ) ± SD                | 80.6 ± 20.7               | 87.5± 23.9                   | <0.001  |
| Percent PVC (IQR)                                                         | 0.01% (0.002 – 0.08)      | 0.02% (0.002 – 0.2)          | 0.04    |

\*Index measurements are divided by the body surface area

Abbreviations: BMI, body mass index; IQR, interquartile range.

**Supplemental Table 2.** Baseline Characteristics of Participants as Stratified by Incident CHF Status

| Variable                                                                  | No Incident CHF<br>(n=831) | Incident CHF<br>(n=308) | P value |
|---------------------------------------------------------------------------|----------------------------|-------------------------|---------|
| Age in years (IQR)                                                        | 70 (68 – 74)               | 72 (69 – 75)            | <0.001  |
| Female (%)                                                                | 500 (60%)                  | 157 (51%)               | 0.005   |
| Race (%)                                                                  |                            |                         |         |
| White                                                                     | 791 (95%)                  | 292 (95%)               | 0.77    |
| Black                                                                     | 36 (4%)                    | 15 (5%)                 |         |
| Asian/Pacific Islander                                                    | 1 (0.1%)                   | 0 (0%)                  |         |
| Other                                                                     | 3 (0.4%)                   | 1 (0.3%)                |         |
| Mean BMI (kg/m <sup>2</sup> ) ± SD                                        | 26.3 ± 4.0                 | 27.5 ± 4.4              | <0.001  |
| Hypertension (%)                                                          | 415 (50%)                  | 199 (65%)               | <0.001  |
| Coronary Artery Disease (%)                                               | 110 (13%)                  | 73 (24%)                | <0.001  |
| Diabetes (%)                                                              | 91 (11%)                   | 73 (24%)                | <0.001  |
| Mean Left Ventricular Diastolic Diameter Index* (cm/m <sup>2</sup> ) ± SD | 2.8 ± 0.3                  | 2.8 ± 0.4               | 0.52    |
| Mean Left Ventricular Mass Index* (g/m <sup>2</sup> ) ± SD                | 80.2 ± 20.6                | 88.1 ± 23.7             | <0.001  |
| Percent PVCs (IQR)                                                        | 0.01% (0.002 – 0.09)       | 0.02% (0.002 – 0.2)     | 0.002   |

\*Index measurements are divided by the body surface area

Abbreviations: BMI, body mass index; IQR, interquartile range.

**Supplemental Table 3.** Association Arrhythmias Observed on Holter Monitoring with Incident Heart Failure and Mortality

| Arrhythmia Observed During Holter Study                | Un-adjusted Incident Heart Failure |             |         | Adjusted Incident Heart Failure |             |         |
|--------------------------------------------------------|------------------------------------|-------------|---------|---------------------------------|-------------|---------|
|                                                        | HR                                 | 95% CI      | P value | HR                              | 95% CI      | P value |
| Atrial Fibrillation (n=3, 0.26%)                       | 5.40                               | 1.34 – 21.8 | 0.018   | 7.77                            | 1.91 – 31.6 | 0.004   |
| Ventricular Tachycardia (n=63, 5.5%)                   | 2.27                               | 1.55 – 3.34 | <0.001  | 1.52                            | 1.00 – 2.31 | 0.047   |
| Number of Ventricular Tachycardia Runs (Range 0 – 106) | 1.00                               | 0.97 – 1.03 | 0.905   | 1.00                            | 0.96 – 1.03 | 0.809   |

Abbreviations: HR, hazard ratio; CI, confidence interval.

Multivariable models included adjustment for age, gender, race, body mass index, and a history of hypertension, diabetes, coronary artery disease, beta-blocker use, Holter-based atrial fibrillation, and Holter-based ventricular tachycardia or number of Holter-based ventricular tachycardia episodes.
